# Supplementary material for: A Novel Diterpene Glycoside with Nine Glucose Units from Stevia rebaudiana Bertoni
Source: PubMed Central journal article supplement (PMC5372722; doi:10.3390/biom7010010), 2017-01-31
Supplement: biomolecules-07-00010-s001.pdf [file biomolecules-07-00010-s001.pdf]

# Supplementary Materials: A Novel Diterpene Glycoside with Nine Glucose Units from *Stevia rebaudiana* Bertoni

Indra Prakash, Gil Ma, Cynthia Bunders, Romila D. Charan, Catherine Ramirez, Krishna P. Devkota and Tara M. Snyder

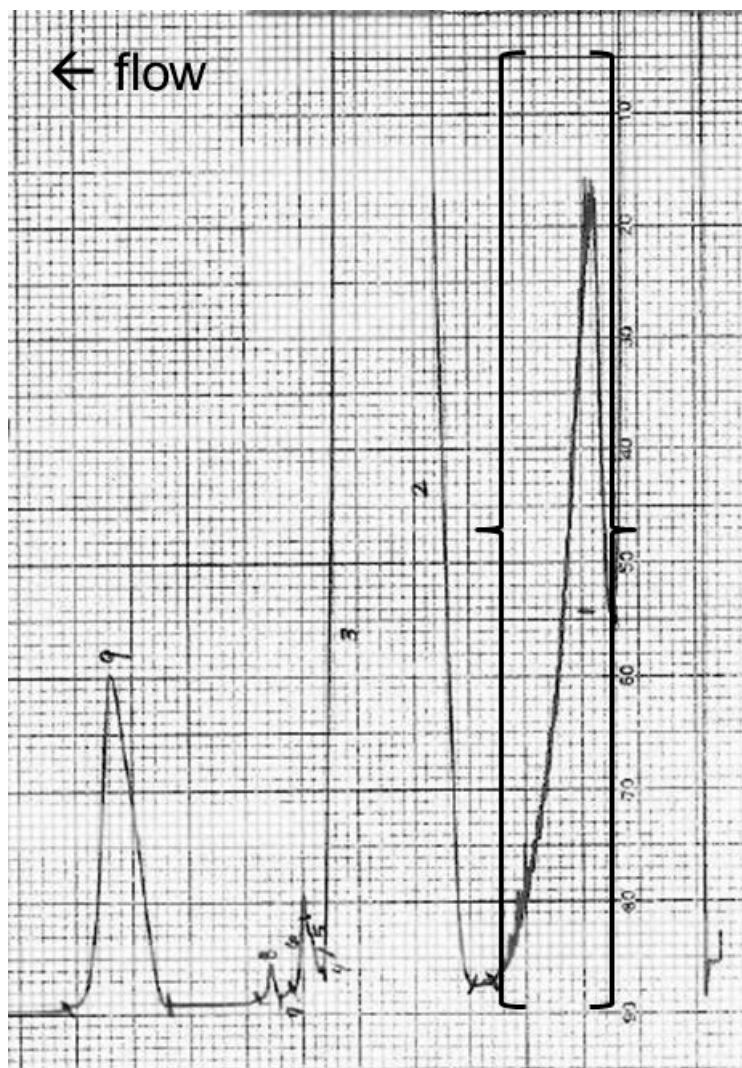

**Figure S1.** Preparative High-Performance Liquid Chromatography (HPLC) trace from primary chromatographic process. Target fraction (Fraction 1) is identified in brackets.

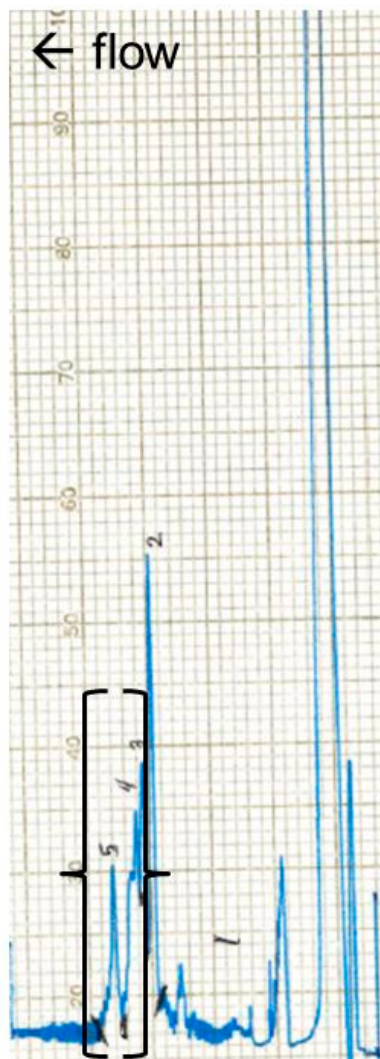

**Figure S2.** Preparative HPLC trace from second chromatographic process. Target fractions (Fractions 4 and 5) are identified in brackets.

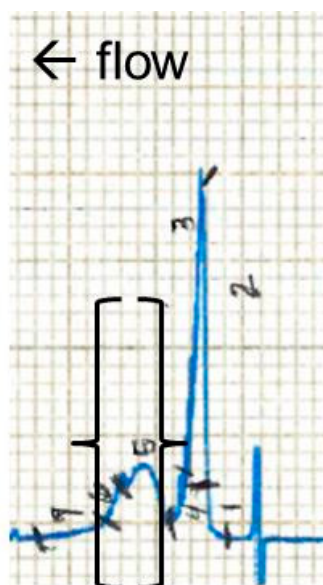

**Figure S3.** Preparative HPLC trace from third chromatographic process. Target fractions (Fractions 5 and 6) are identified in brackets.

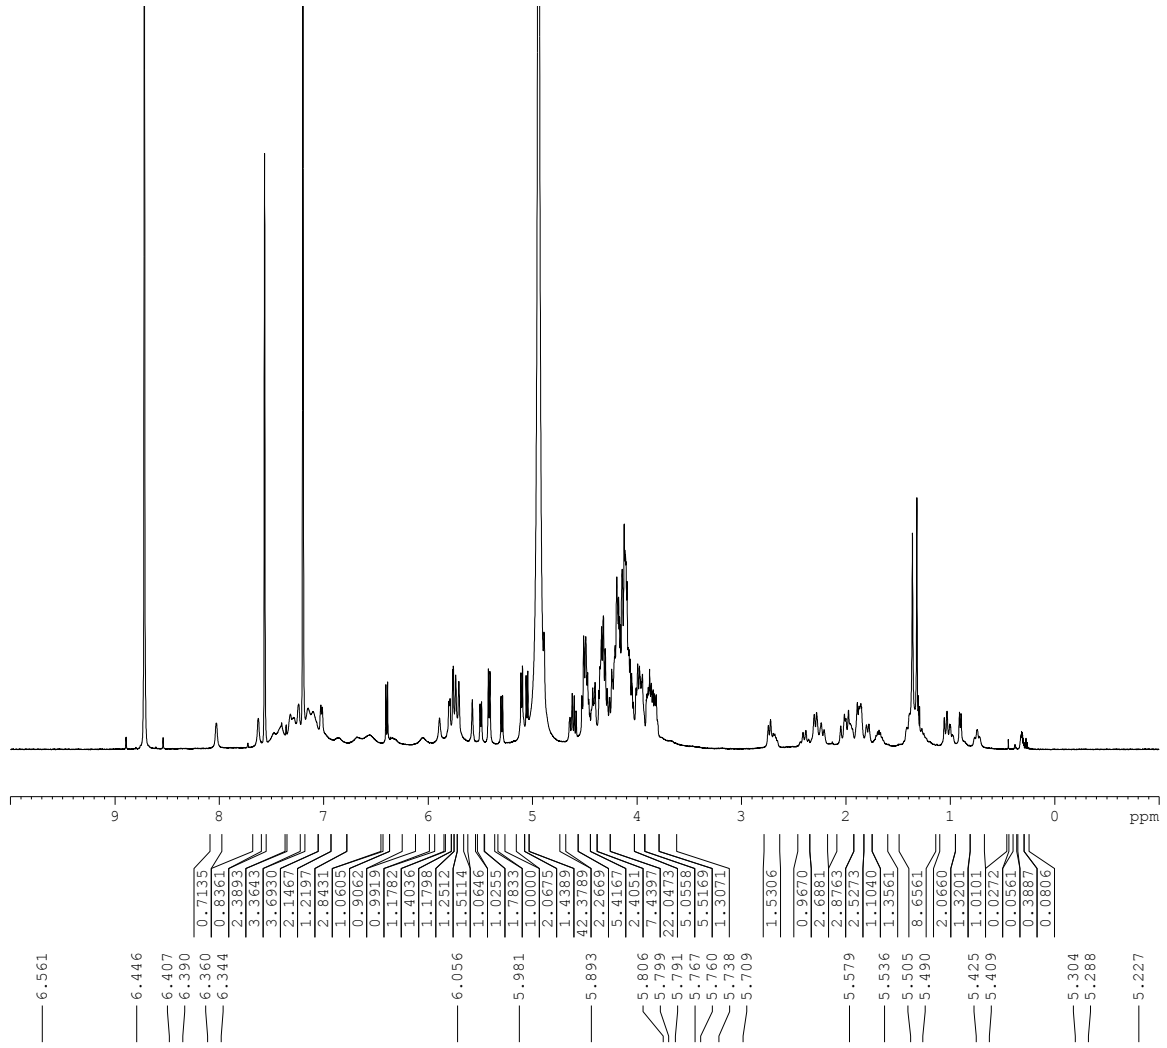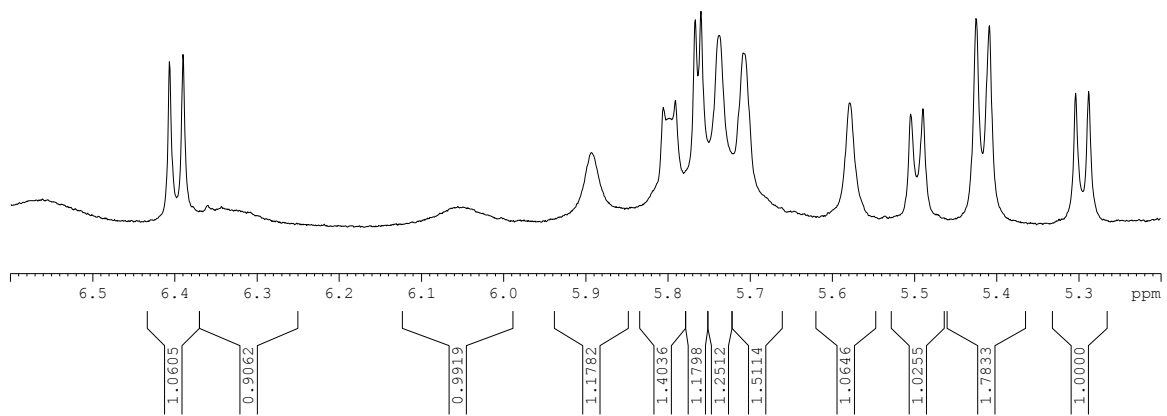

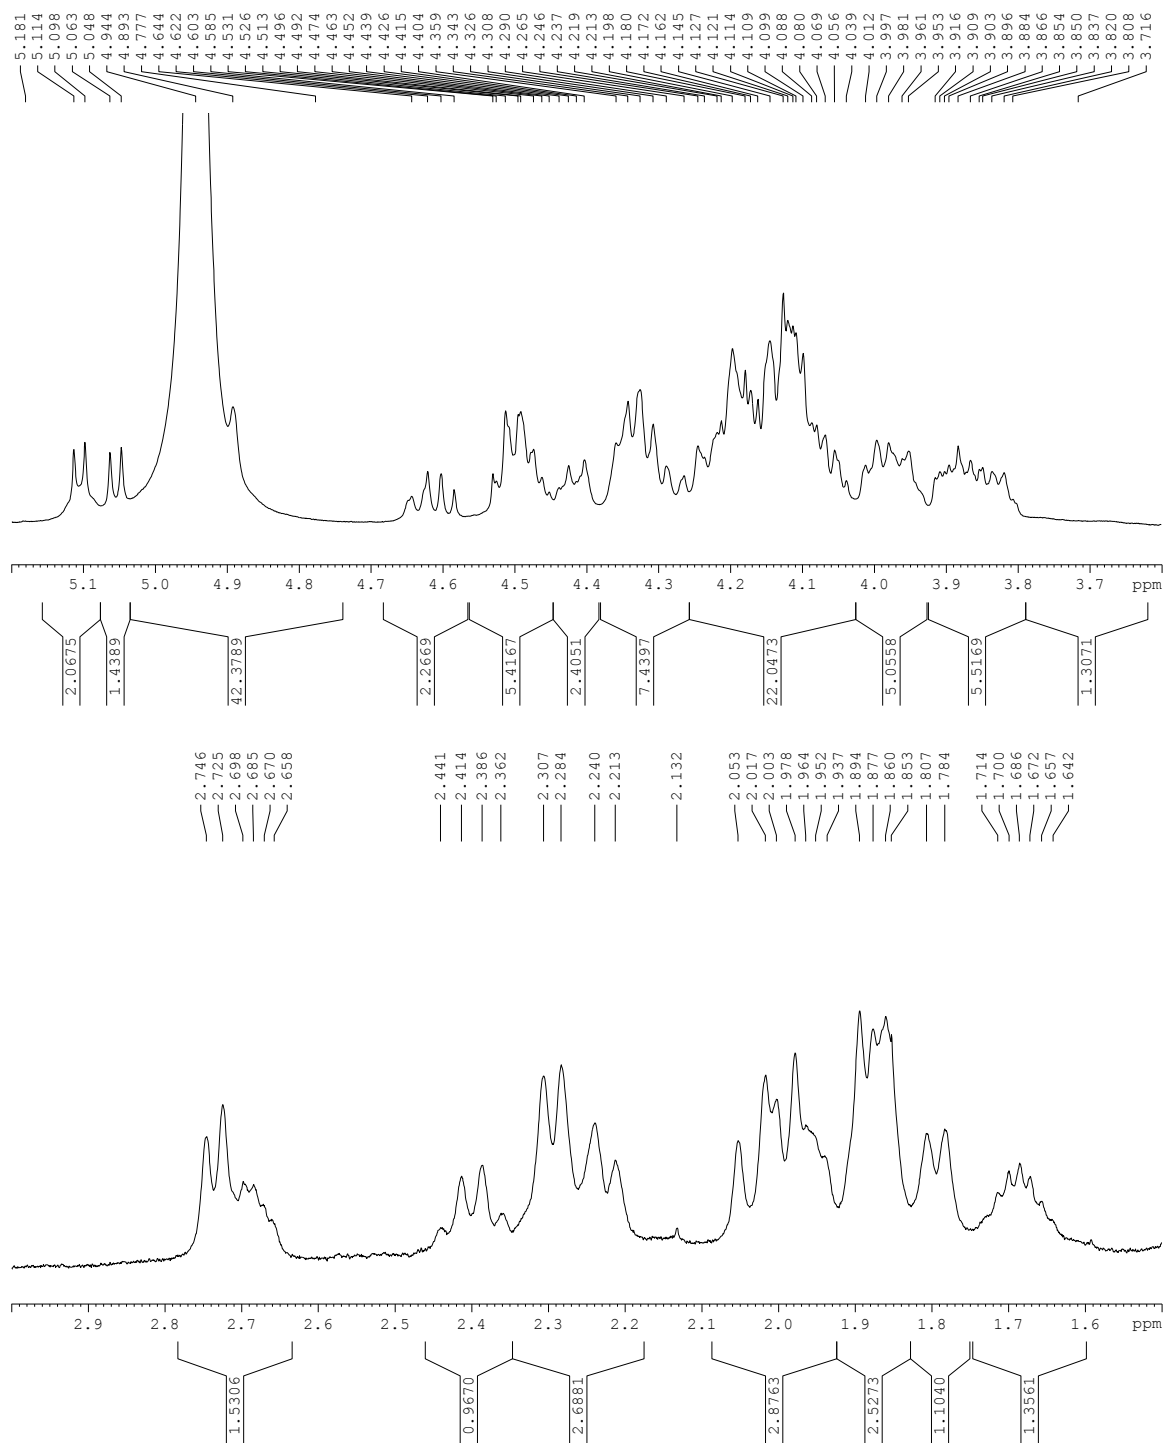

**Figure S4.** <sup>1</sup>H Nuclear Magnetic Resonance (NMR) spectra, full scale and expansions of Rebaudioside IX (1).

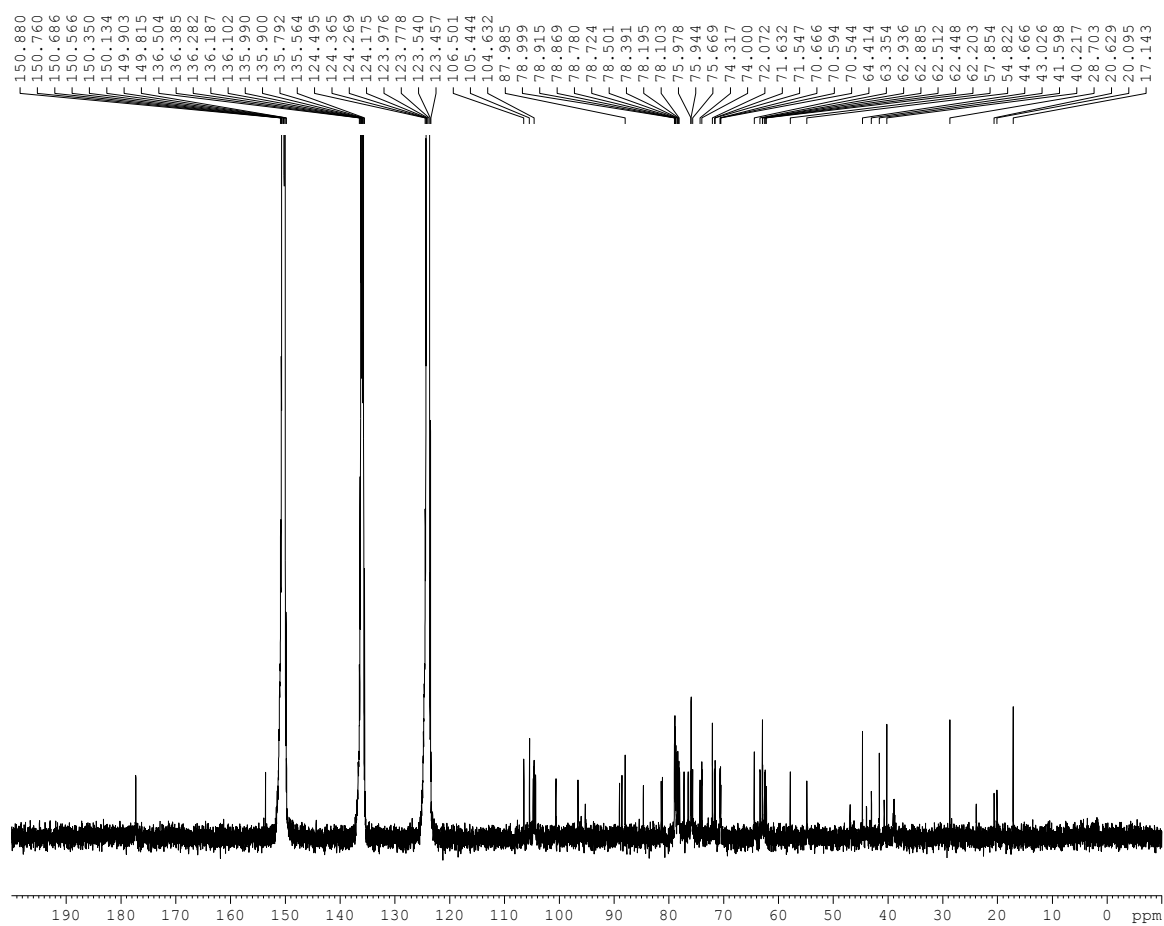

Figure S5.  $^{13}\text{C}$  NMR spectrum of Rebaudioside IX (1).

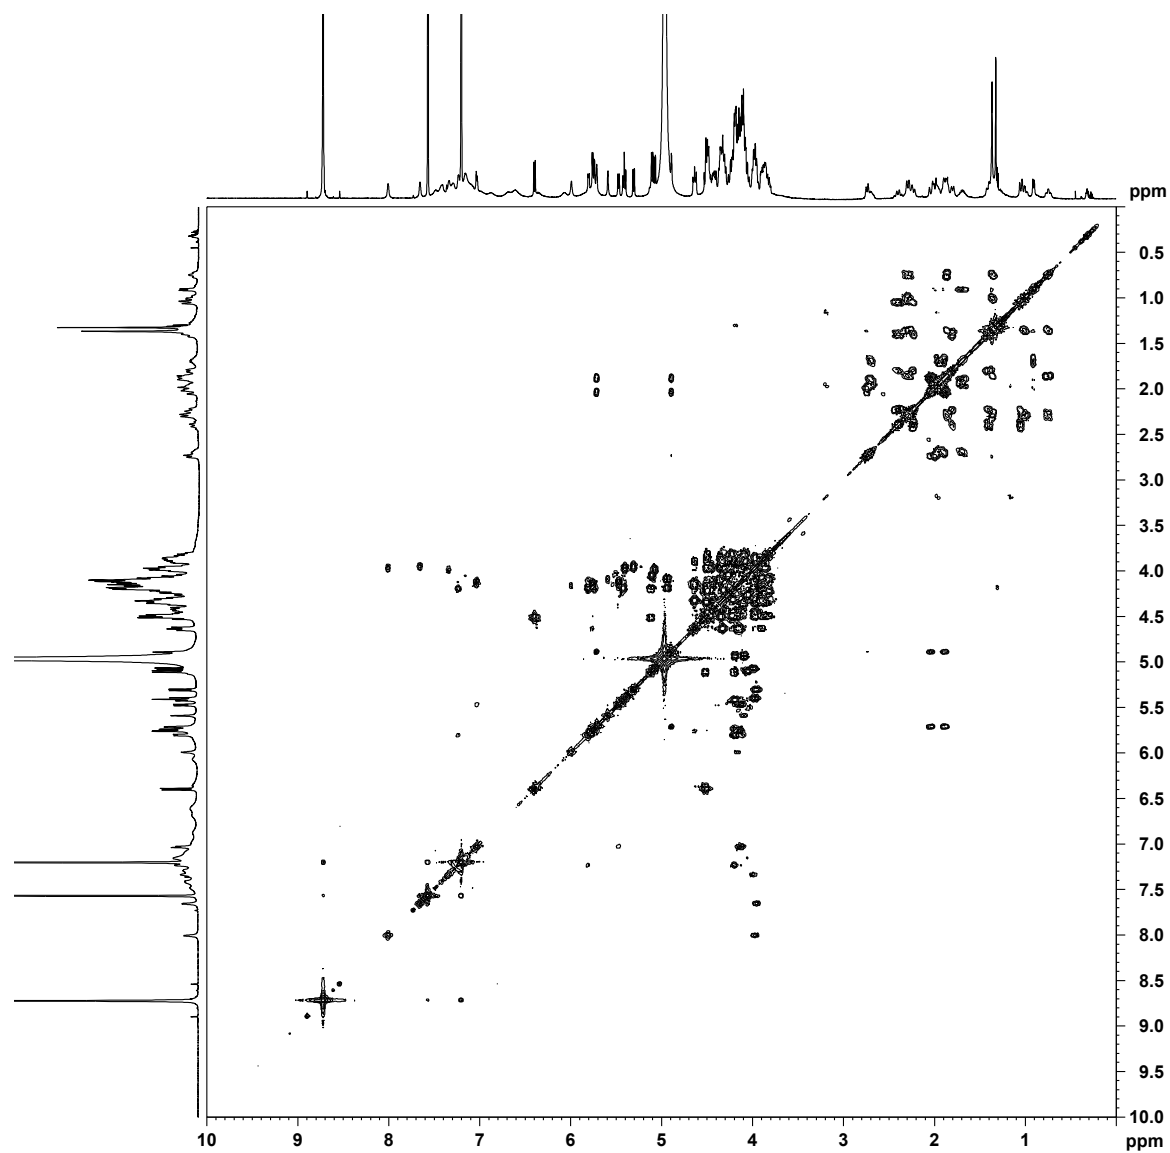

**Figure S6.**  $^1\text{H}$ - $^1\text{H}$  Correlation Spectroscopy (COSY) spectrum of Rebaudioside IX (1).

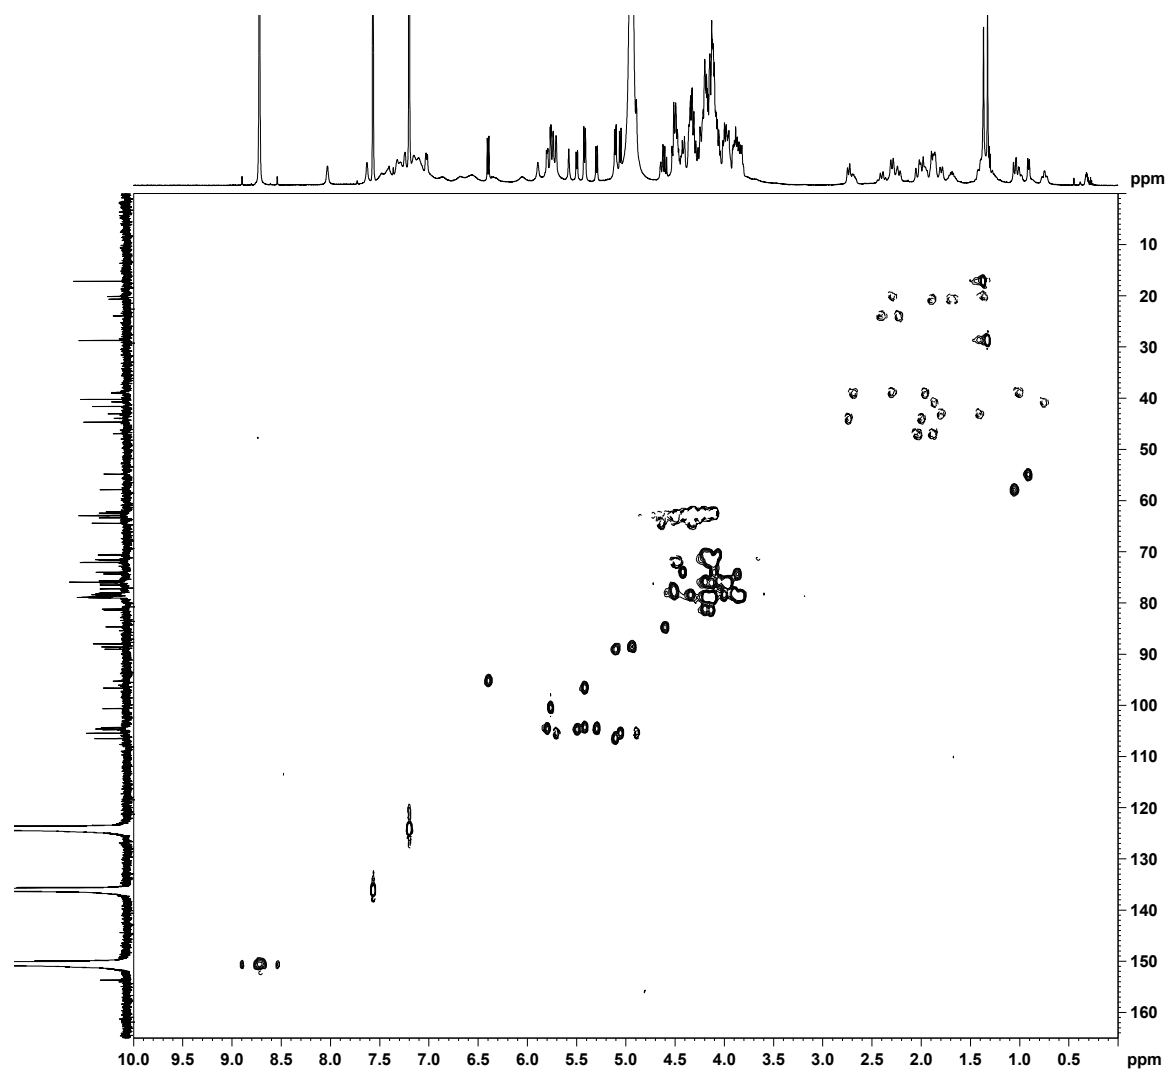

**Figure S7.**  $^1\text{H}$ - $^{13}\text{C}$  Heteronuclear Single Quantum Coherence-Distortionless Enhancement Polarization Transfer (HSQC-DEPT) spectrum of Rebaudioside IX (1).

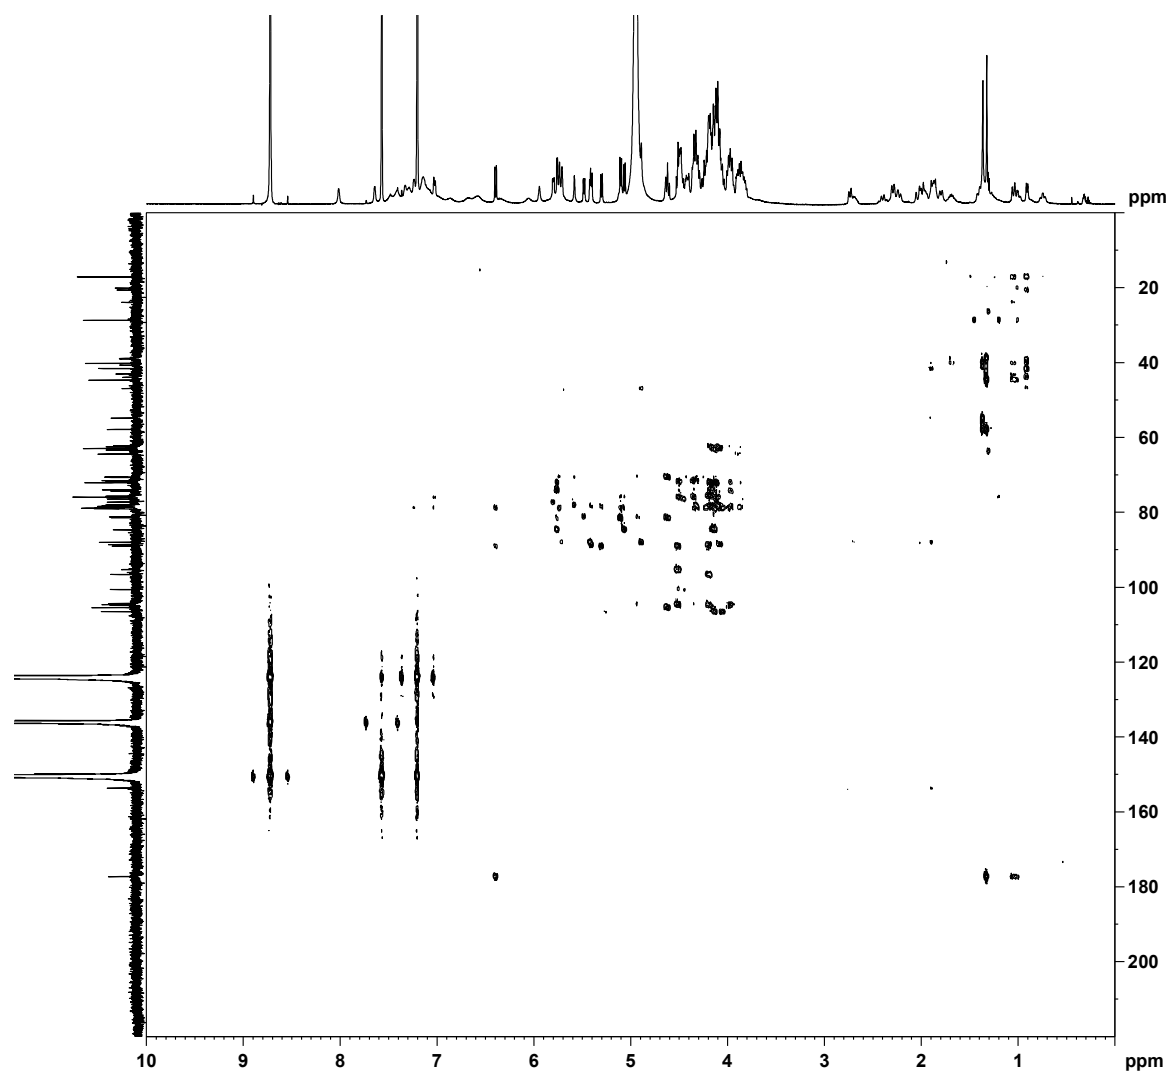



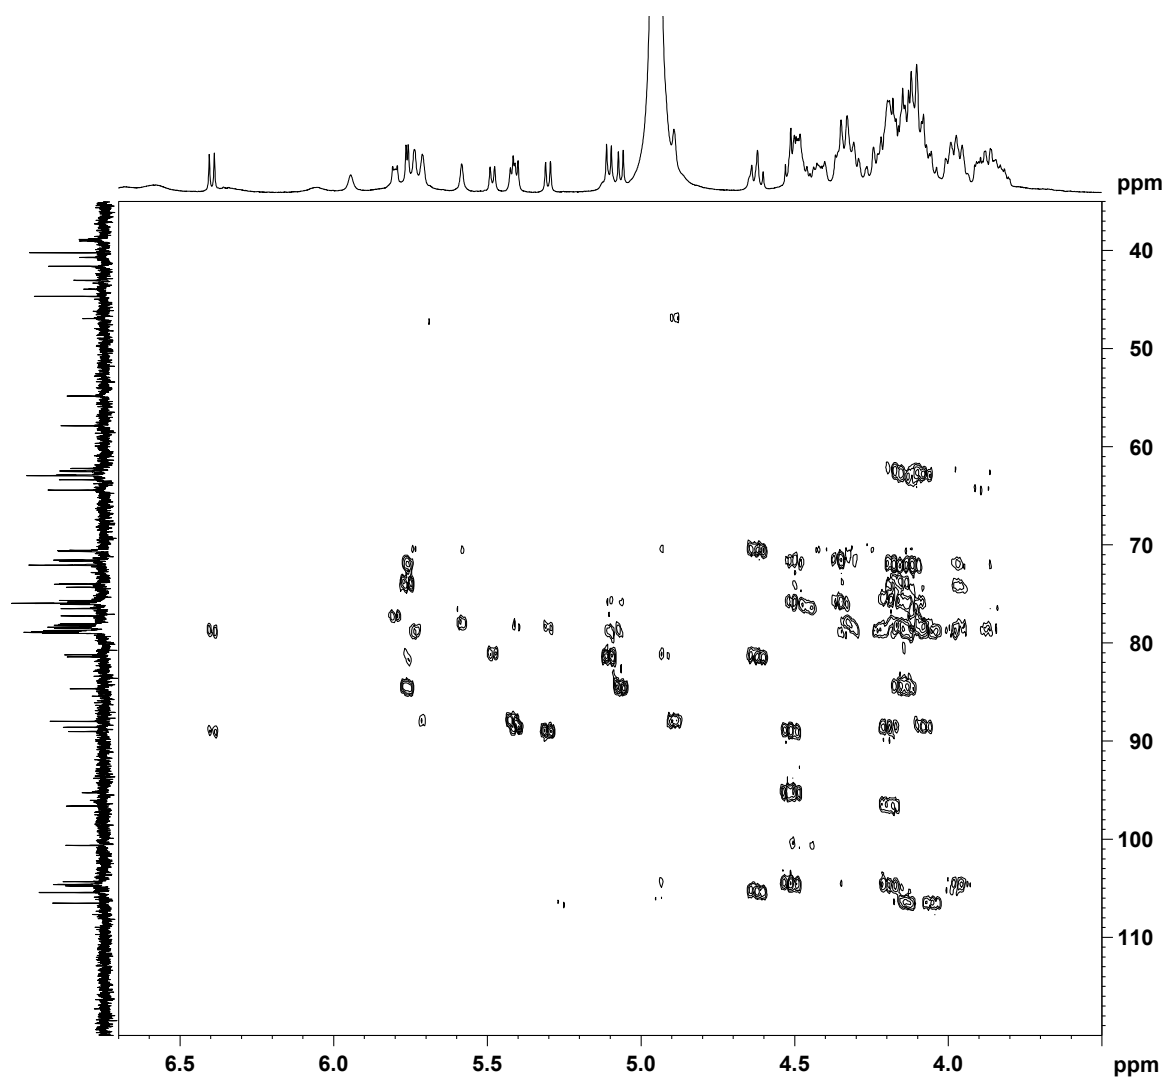

**Figure S8.**  $^1\text{H}$ - $^{13}\text{C}$  Heteronuclear Multiple Bond Correlation (HMBC) spectra, full scale and expansion of Rebaudioside IX (1).

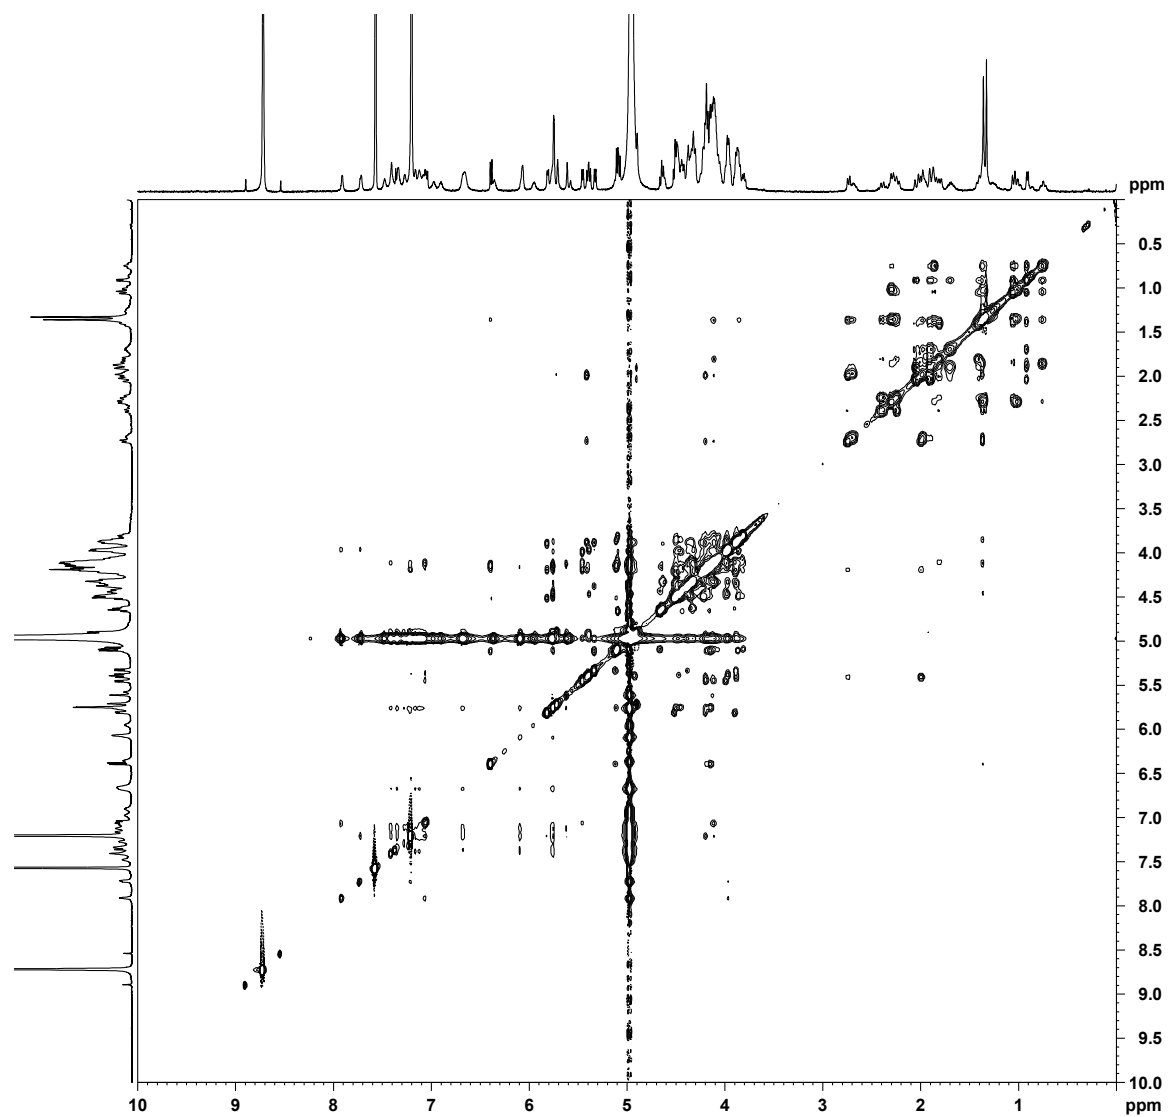

**Figure S9.**  $^1\text{H}$ - $^1\text{H}$  Nuclear Overhauser Effect Spectroscopy (NOESY) spectrum of Rebaudioside IX (1).
